1 **Title:**

2 **Homocysteine-induced endoplasmic reticulum stress activates FGF21 via CREBH,**  
3 **resulting in browning and atrophy of white adipose tissue in *Bhmt* knockout mice.**

4 **Authors:**

5 Manya Warri<sup>1</sup>, Evan M. Paules<sup>1,3</sup>, Walter B. Friday<sup>1</sup>, Frances Bramlett<sup>1</sup>, Hyunbae Kim<sup>2</sup>, Kezhong  
6 Zhang<sup>2</sup> and Isis Trujillo-Gonzalez<sup>\*1,3</sup>

7 **Affiliations:**

8 <sup>1</sup>Department of Nutrition, UNC Nutrition Research Institute, UNC-Chapel Hill and Kannapolis,  
9 NC, USA.

10 <sup>2</sup>Center for Molecular Medicine and Genetics, Wayne State University School of Medicine,  
11 Detroit, MI, USA.

12 <sup>3</sup>Department of Nutrition, Gillings School of Global Public Health, University of North Carolina at  
13 Chapel Hill, Chapel Hill, NC 27514, USA.

14

15 **\*Correspondence:**

16 Isis Trujillo-Gonzalez, PhD  
17 Research Assistant Professor  
18 UNC Nutrition Research Institute  
19 University of North Carolina at Chapel Hill  
20 500 Laureate Way, Room 2018  
21 Kannapolis, NC 28081

22 Email: [isis\\_trujillo@unc.edu](mailto:isis_trujillo@unc.edu)

23 Phone: 704-250-5020

24

25 **Short title:** *Betaine homocysteine S-methyltransferase and lipodisprophy in mice.*

26 **List of abbreviations:**

|    |               |                                                                      |
|----|---------------|----------------------------------------------------------------------|
| 27 | CIDEA         | Cell death-inducing DFFA-like effector A                             |
| 28 | ATF3          | Activating Transcription Factor 3                                    |
| 29 | BHMT          | Betaine Homocysteine-S-Methyltransferase                             |
| 30 | BAT           | Brown adipose tissue                                                 |
| 31 | CHOP          | c/EPB homologous protein                                             |
| 32 | CREBH         | Cyclic AMP response element binding protein H                        |
| 33 | FGF21         | Fibroblast Growth Factor 21                                          |
| 34 | Hcy           | Homocysteine                                                         |
| 35 | PCG- $\alpha$ | Peroxisome Proliferator-activated receptor gamma coactivator 1-alpha |
| 36 | SAM           | S-adenosyl methionine                                                |
| 37 | UCP1          | Uncoupling Protein 1                                                 |
| 38 | WAT           | White adipose tissue                                                 |

39

40

41

42

43

44

45

46

47

48

49

50

51 **Abstract**

52 Betaine-homocysteine methyltransferase (BHMT) catalyzes the transfer of methyl-groups  
53 from betaine to homocysteine (Hcy) producing methionine and dimethylglycine. In this  
54 work, we characterize *Bhmt* wildtype (WT) and knockout (KO) mice that were fully  
55 backcrossed to a C57Bl6/J background. Consistent with our previous findings, *Bhmt* KO  
56 mice had decreased body weight, fat mass and adipose tissue weight compared to WT.  
57 Histological analyses and gene expression profiling indicate that adipose browning was  
58 activated in KO mice and contributed to the adipose atrophy observed. BHMT is not  
59 expressed in adipose tissue but is abundant in liver, thus, a signal must be originating  
60 from the liver that modulates adipose tissue. We found that, in *Bhmt* KO mice,  
61 homocysteine-induced endoplasmic reticulum (ER) stress, with activation of hepatic  
62 transcription factor cyclin AMP response element binding protein (CREBH), mediated an  
63 increase in hepatic and plasma concentrations of fibroblast growth factor 21 (FGF21),  
64 which is known to induce adipose browning. CREBH binds to the promoter regions of  
65 FGF21 to activate its expression. Taken together, our data indicate that deletion of a  
66 single gene in one-carbon metabolism modifies adipose biology and energy metabolism.  
67 It would be interesting to determine whether people with functional polymorphisms in  
68 *BHMT* exhibit a similar adipose atrophy phenotype.

69

## 70 **Keywords**

71 betaine-homocysteine S-methyltransferase, lipodystrophy, ER stress, CREBH, BHMT, FGF21,  
72 homocysteine

73

74

## 75 **INTRODUCTION**

76 Betaine-homocysteine S-methyltransferase (BHMT) is an important Zn-dependent thiol-  
77 methyltransferase that catalyzes the formation of methionine from homocysteine using betaine  
78 as its methyl donor (1, 2). Methionine is subsequently converted to S-adenosylmethionine (SAM)  
79 and is used for various methylation reactions (3). BHMT is one of the most abundant proteins in  
80 the liver, amounting to 0.6-1% of total protein (4), and it is also found in kidney, the eye lens, and  
81 at lower activities in other tissues, but not in adipose (5, 6). Mice in which *Bhmt* was deleted  
82 (whole body; *Bhmt* KO) have increased hepatic concentrations of the substrates betaine and  
83 homocysteine (Hcy) (5, 7). These KO mice develop increased energy expenditure associated with  
84 lower body weight compared to their wild type (WT) littermates and develop lipodystrophy and  
85 fatty liver (5, 7). At 1 year of age, 64% of *Bhmt* KO mice develop hepatic tumors (5, 7). Though  
86 the mechanisms underlying the hepatocarcinogenesis have been explored (3), those involved in  
87 the adipose wasting have not been addressed, we do so in this paper.

88

89 In this study, we show that deletion of *Bhmt* in mice causes increased Hcy concentrations in  
90 tissues, and that this initiates a signaling cascade involving endoplasmic reticulum stress (ER  
91 stress) with activation (cleavage) of cyclic AMP response element binding protein H (CREBH)  
92 generating a transcription factor that promotes the expression of genes including fibroblast growth  
93 factor 21 (*Fgf21*; previously, we reported increased *Fgf21* concentrations produced by the liver in  
94 *Bhmt* KO mice (7)). *Fgf21* stimulates adipose browning and energy expenditure by upregulating  
95 the expression of the transcriptional co-activator peroxisome proliferator-activated receptor  
96 gamma coactivator 1-alpha ( $Pgc-1\alpha$ ), as well as uncoupling protein 1 (*Ucp1*). This culminates in  
97 adipose wasting in *Bhmt* KO mice.

98

99

## 100 **Results**

### 101 ***Deletion of *Bhmt* promotes adipose atrophy in fully backcrossed mice***

102 We previously reported that *Bhmt* knockout mice on a mixed 129/SV x C57BL/6J background  
103 (generations F3-F5), between 7-12 weeks of age, had reduced adipose mass and smaller-sized  
104 adipocytes (7). Since genetic background of mice can have a profound influence on the metabolic  
105 phenotype of mice (8), we decided to reexamine this lipodystrophy phenotype after backcrossing  
106 *Bhmt* KO mice to C57Bl/6 to generate a near congenic (99.74%) line. In this near congenic line,  
107 we confirmed that, in the *Bhmt* KO compared to wild type (WT), there was a significant reduction  
108 in total body weight (**Fig 1A**) and adipose weight (**Fig 1B**) in mice. Histological analysis of adipose  
109 tissue taken from *Bhmt* KO mice showed reduced adipocyte cell size and reduced size of lipid  
110 droplets in both gonadal white adipose tissue (gWAT; data not shown) and inguinal white adipose  
111 tissue (iWAT) as compared to WT (**Fig 1C and Fig 1D**). Adipose atrophy is characterized by  
112 reduced fat/lean mass and the ‘slimming of adipocytes’ in both size and volume (9), and our data  
113 show that this process was dependent on *Bhmt* status.

114

115

### 116 ***Adipose atrophy in *Bhmt* KO mice is associated with adipose browning in inguinal adipose*** 117 ***depots***

118 Since smaller adipocytes and increased whole body energy expenditure and heat production are  
119 classical features of browning of WAT (10), and since adipose browning is known to promote  
120 adipose atrophy in several mouse models (10-14), we sought to determine whether the WAT  
121 atrophy observed in *Bhmt* KO mice is due to WAT browning. We first measured a number of  
122 molecular markers that are frequently associated with adipose browning (15-17). Uncoupling  
123 Protein 1 (*Ucp1*) mRNA (**Fig 2A**) along with mRNA for other thermogenic genes such as  
124 Peroxisome proliferator-activated receptor gamma coactivator 1-alpha (*Pgc-1 $\alpha$* ) and the lipid-  
125 droplet-associated protein cell death-inducing DFFA-like effector A (*CideA*) (**Fig 2B – C**) were all

126 significantly upregulated in iWAT collected from *Bhmt* KO mice compared to WT. Together, these  
127 results indicate that lack of *Bhmt* is sufficient to induce the expression of adipose browning  
128 markers.

129

### 130 ***Bhmt* KO livers have increased homocysteine concentrations**

131 Plasma total Hcy concentrations were significantly increased in *Bhmt* KO mice on a mixed 129/SV  
132 x C57BL/6J background (generations F3-F5), as we previously reported (7). We now show that,  
133 in the fully backcrossed *Bhmt* KO mice, both plasma Hcy concentrations (~11 fold) and liver Hcy  
134 concentrations (~2 fold) were increased in KO as compared to WT mice (**Fig 3A and B**). Thus,  
135 loss of *Bhmt* results in the accumulation of plasma and liver Hcy .

136

### 137 ***Bhmt* KO livers have increased ER stress and have more activated CREBH**

138 Since high tissue Hcy is a known cause of ER stress, which in turn regulates a number of  
139 transcription factors residing in the ER (18, 19), we decided to see if *Bhmt* KO mice experience  
140 increased ER stress compared to WT. We measured gene expression of DNA damage-inducible  
141 transcript 3, also known as C/EBP homologous protein (CHOP) and Activating Transcription  
142 Factor 3 (ATF3), as indicators of ER stress (20-30). We found that expression of these genes  
143 were increased by 1.5-fold and 3-fold, respectively, in *Bhmt* KO compared to WT mouse livers  
144 (**Figs 4A and 4B**). Thus, *Bhmt* KO mice have increased ER stress compared to their WT  
145 counterparts.

146

147 Next, we searched for transcription factors that reside in the ER and are produced in response to  
148 ER stress and which are also known to regulate FGF21. We found that the hepatic transcription  
149 factor known as Cyclin AMP Responsive Element Binding Protein – H (CREBH) fulfilled the above  
150 criteria (19, 31, 32). We measured full length and activated CREBH in the liver lysates prepared

151 from both *Bhmt* WT and KO mice by Western blot analysis and found that the cleaved activated  
152 form of CREBH was significantly increased in *Bhmt* KO compared to WT liver (**Figs 4C and 4D**).

153

#### 154 ***Bhmt* KO livers have increased FGF21 concentrations**

155 Since activated CREBH binds to the *Fgf21* promoter and activates its transcription (33), we  
156 suggest that this explains our earlier finding that *Bhmt* KO mice on a mixed 129/SV x C57BL/6J  
157 background (generations F3-F5) had increased FGF21 concentrations (7). We now show that in  
158 fully backcrossed *Bhmt* KO mice, compared to WT, plasma and hepatic FGF21 concentrations  
159 were increased more than 2-fold (**Figs 5A and 5B**).

160

#### 161 **Discussion**

162 The deletion of *Bhmt* in mice results in the animal storing less fat in adipose tissue even though  
163 BHMT is not expressed in adipose tissue (7). This adipose atrophy is the result of reduced  
164 triglyceride storage within iWAT associated with increased energy expenditure and heat  
165 production as measured by indirect calorimetry without a matching increase in food consumption  
166 (7). We now report that the elevated Hcy concentrations that occur when the *Bhmt* gene is  
167 deleted, increase ER stress signalling, which results in generation of activated CREBH, and this,  
168 in turn, caused increased expression in hepatic FGF21. This FGF21 is transported via blood to  
169 adipocytes where it promotes the browning of white adipose tissue and increases expression of  
170 PGC-1 $\alpha$  which increases mitochondrial number, and increases the expression of UCP-1 which  
171 uncouples mitochondrial respiration and thereby increases energy expenditure and heat  
172 production. (**Fig 6**).

173

174 As noted earlier, BHMT catalyzes the formation of methionine from Hcy using betaine as its methyl  
175 donor (1, 2). As expected, deletion of *Bhmt* should increase concentrations of both substrates  
176 (betaine and Hcy) used by this enzyme. Increased concentrations of Hcy cause ER stress both

177 *in vitro* and *in vivo* (20, 21, 23, 26, 27, 30, 34-36) by disrupting disulfide bond formation and thus  
178 leading to protein misfolding (21). Though we argue that it is the the accumulation of Hcy that  
179 results in ER stress and subsequent browning of adipose tissue, it is possible that the  
180 accumulation of the other precursor, betaine, also contributes to adipocyte browning as feeding  
181 mice a diet containing 5% betaine increases plasma concentrations of FGF21 (7, 37). Since *Bhmt*  
182 deletion resulted in reduced methylation potential by increasing S-adenosylhomocysteine  
183 concentrations, in earlier studies we examined whether the FGF21 promoter region might be  
184 hypomethylated in the *Bhmt* KO mouse, leading to increased expression of this gene. However,  
185 reduced representation bisulfite sequencing performed on liver DNA from WT and KO mice did  
186 not reveal any methylation differences in this gene (3).

187

188 ER stress is initiated by numerous metabolic stressors including high concentrations of  
189 homocysteine (20, 21, 23, 26) and has been associated with hepatic lipid accumulation, obesity  
190 and cancer (24, 38). Also, it has been implicated in WAT browning (39). Transcription factors that  
191 are regulated by ER stress include Sterol Regulatory Element Binding Proteins (SREBP) and  
192 CREBH (29). CREBH is ER-tethered and is synthesized in the liver as a precursor which then  
193 gets activated via cleavage by Golgi-localized proteases and the activated form then accumulates  
194 in the nucleus to act as a transcription factor (19) that promotes expression of the liver-secreted  
195 peptide endocrine hormone FGF21 (31, 33). Promoter analysis studies show that CREBH can  
196 bind and activate FGF21 promoter at position -60 to -40 bp. Chromatin immunoprecipitation  
197 studies reveal that CREBH directly binds to the FGF21 promoter and controls the expression and  
198 plasma levels of FGF21 (33, 40). Using CREBH KO and CREBH over-expression mouse models  
199 it has been shown that FGF21 mediates many of CREBH's effects on fatty acid metabolism and  
200 ketogenesis (41). Also, FGF21 is responsible for the body weight loss induced by CREBH over-  
201 expression and particularly the fat mass reduction (31). Therefore, it is reasonable to propose that  
202 CREBH is the upstream transcriptional regulator of FGF21 in *Bhmt* KO mice. In addition to



203 deletion of *Bhmt*, essential amino acid restriction, fasting and impaired muscular and hepatic  
204 autophagy induce ER stress and result in substantial increases in circulating FGF21 and UCP1  
205 levels in adipose (42, 43).

206

207 Many endocrine and autocrine signals stimulate adipose browning, including FGF21 (44). FGF21  
208 binds to its receptor (FGFR) and coreceptor  $\beta$ -Klotho (KLB) to activate a downstream signaling  
209 cascade that ultimately leads to expression of its target genes (43). FGF21 stimulates adipose  
210 browning and energy expenditure by upregulating the expression of transcriptional co-activator  
211 PGC-1 $\alpha$  in adipose tissue (17, 43, 45). Browning of white adipose tissue is characterized by the  
212 appearance of brown-like or beige adipocytes within WAT (46, 47). These inducible beige  
213 adipocytes are morphologically similar to brown adipocytes and express uncoupling protein 1 and  
214 contribute to thermogenesis (39, 47).

215

216 As noted earlier, adipose atrophy is characterized by reduced fat/lean mass and the excessive  
217 ‘slimming of adipocytes’ in both size and volume (9). Increased metabolic rate and adipose  
218 browning has been proposed as causes for adipose atrophy (9, 11-14, 48-52). Even though  
219 browning of WAT is generally considered beneficial in obesity (reducing body weight and  
220 increasing energy expenditure), several lines of evidence suggest that it also is associated with  
221 adverse outcomes such as hepatic steatosis, cancer associated cachexia (CAC) and burn-related  
222 cachexia (11, 14, 49, 50).

223

224 Is reduced BHMT expression likely to be a problem in people? Several functional *Bhmt* variants  
225 have been identified in humans which are associated with increased risk for cancer and other  
226 diseases (53-56), however no information is available on the metabolic phenotype of humans  
227 carrying those variants. It would be interesting to explore whether people with functional *Bhmt*  
228 variants have a metabolic phenotype similar to that which we describe in mice, and determine

229 whether proposed Hcy-CREBH-FGF21–adipose browning pathway drives this phenotype. This  
230 would not only help us to understand how genetic variations in one carbon metabolism affect  
231 obesity but also our understanding of how adipose atrophy develops in diseases such as cancer.

232

## 233 **MATERIALS AND METHODS**

234 **Animals.** Mice used in these experiments were bred and maintained at the David H. Murdock  
235 Research Institute (DHMRI), Center for Laboratory Animal Science facilities. All animal  
236 experiments were performed in accordance with the protocols approved by David H. Murdock  
237 Research Institute Institutional Animal Care and Use Committee. The study was carried out in  
238 compliance with the ARRIVE guidelines.

239 *Bhmt* KO mice were generated as previously described (5). *Bhmt* KO mice were fully  
240 backcrossed to C57B1/6 wild-type mice to generate a near congenic (99.73 %) mouse line.  
241 Genotyping of *Bhmt* animals was performed using the following primers: *Bhmt* WT\_F 5'–  
242 GACTTT TAAAGAGTGGTGGTACATACCTTG-3', *Bhmt* WT\_R -5' –  
243 TCTCTCTGCAGCCACATCTGAACTTGTCTG-3', *Bhmt* KO\_F- 5' –  
244 TTAActCAACATCACAACAACAGATTTcag -3', *Bhmt* KO\_R 5' –TTG  
245 TCGACGGATCCATAACTTCGTATAAT -3'. *Bhmt* WT and KO mice were mated and maintained  
246 *ad libitum* on a AIN 76A diet (Dyets, Bethelhem, PA, USA) and were kept in a temperature-  
247 controlled environment at 24°C and exposed to a 12 hours light and dark cycle. At 6-8 weeks,  
248 mice were euthanized and tissue collection was performed.

249

250 **Histological analysis.** Tissues were fixed in buffered formalin, dehydrated in ethanol and then  
251 transferred to xylene solution for embedding in paraffin. Serial sections at 5 mm thickness were  
252 made from paraffin-embedded tissue and then stained with hematoxylin and eosin. Images were  
253 analyzed with light microscopy. Adipocyte area was calculated by measuring the area of cells per  
254 condition, at 200x magnification, using Image J, and presented as mean ± SEM.

255

256 **RT-PCR analysis.** Total RNA was extracted from tissues of *Bhmt* WT and *Bhmt* KO mice, using  
257 RNAeasy mini Kit (Qiagen, Hilden, Germany). cDNA synthesis was performed by using a Script™  
258 cDNA SuperMix (Quanta BioSciences, Gaithersburg, MD, USA). For quantitative real-time assays,  
259 amplification was performed by using PerfeCTa qPCR FastMix (Quanta Biosciences). We  
260 designed primers (Sigma) as follows: **UCP1** forward primer: ACTGCCACAACCTCCAGTCATT,  
261 reverse primer CTTTGCCTCACTCAGGATTGG; **PGC1a** forward primer  
262 AGCCGTGACCACTGACAACGAG, reverse primer GCTGCATGGTTCTGAGTGCTAGG; **CIDEA**  
263 forward primer: GCAACCAAAGAAATGCGGAATAG, reverse primer:  
264 CTCGTACATCGTGGCTTTGA; **CHOP** forward primer CAGCGACAGAGCCAGAAT; **ATF3**  
265 forward primer GAGGCGGCGAGAAAGAAA, reverse primer CACTCTCCAGTTTCTC. Ct  
266 values were calculated by SDS 1.2 software (Applied Biosystems, Foster City, CA, USA) and  
267 normalized to *TATA* binding Ct values and expressed as  $2^{-(Ct(\text{gene}) - Ct(\text{housekeeping gene}))}$ .

268

269 **Western blot.** Liver tissues were collected to evaluate CREBH levels. Protein extracts were  
270 prepared using RIPA lysis buffer (Sigma, ST. Louis, USA) supplemented with protease inhibitor  
271 cocktail (Complete, Roche) and sonicated. Total protein concentrations for all samples was  
272 quantified using BCA protein assay (Bio-Rad, Hercules, CA, USA). Proteins were loaded into  
273 SDS-PAGE gels and blotted on PVDF membranes. CREBH antibody was used at 1:1000 dilution.  
274 Enhancer chemiluminescence was used to detect protein. CREBH protein abundance was  
275 quantified using Image J (NIH, Bethesda, MD, USA). Data are presented mean  $\pm$  SEM.

276

277 **FGF21 measurement.**

278 **Serum:** Blood samples from *Bhmt* WT and *Bhmt* KO mice, were collected and were subjected to  
279 centrifugation at 1000 g for 15 min at 4°C. **Liver:** Crushed liver samples were homogenized in  
280 cold phosphate-buffered saline (PBS) (Sigma) with protease inhibitors (Roche). Samples were

281 subjected to centrifugation at 9,600 g for 15 minutes at 4° C. For both plasma and liver,  
282 supernatant protein was quantified using BCA protein assay (Bio-Rad, Hercules, CA, USA)  
283 and diluted to equal concentrations before performing an enzyme-linked immunoabsorbent assay  
284 (ELISA) using a Mouse/Rat FGF21 Quantikine ELISA kit (R&D Systems, Minneapolis, MN)(57) .

285

286 **Homocysteine measurement.** Plasma or liver was homogenized in dithiothreitol (DTT) and  
287 processed to dissociate the proteins by filtration, thereby extracting protein-bound Hcy. The  
288 protein-free filtrate was analyzed for total Hcy by liquid chromatography-electrospray ionization-  
289 tandem mass spectrometry (LC-ESI-MS/MS) as previously described (58, 59).

290

291 **Statistical analysis.** The number of samples per group are indicated in the figure legends. There  
292 were no experimental units or data points excluded. Statistical analyses were performed with  
293 Prism 7 (GraphPad Software, La Jolla, CA, USA). Data distribution was tested for statistical  
294 normality. The Brown-Forsythe test (F test) was used to compare group variances. Groups with  
295 equal distribution were compared using Students' t test. Groups with unequal variances were  
296 compared using the nonparametric Mann-Whitney test. Data are presented as means ± SEM.

297

298 **Acknowledgments.**

299 The authors thank Jennifer Owen (University of North Carolina at Chapel Hill, Nutrition Research  
300 Institute) for providing assistance with experiments; Dr. Steve Orena (University of North Carolina  
301 at Chapel Hill, Nutrition Research Institute) for providing metabolite services. This work was  
302 supported by U.S National Institutes of Health (NIH), National Institute of Diabetes and Digestive  
303 and Kidney Diseases Grants DK056350 and DK115380 (To Dr. Steven Zeisel).

304

305 **Author contributions.**

306 M. W. performed experiments, analyzed the data, conceived the study and wrote the manuscript,  
307 E. M. P. performed experiments, W. B. F. performed experiments, F.B. performed experiments,  
308 H. K. performed western blot experiments, K. Z. performed experiments, I. T-G. developed study  
309 designs, performed experiments, analyzed and interpreted the data, prepared figures and wrote  
310 the manuscript.

311

312 **Competing interests.**

313 The authors declare no competing interests.

314

315

316

317

318

319

320

321

322

323

324

325

326

327

328

329

330

331

332 **FIGURE LEGENDS.**

333 **FIGURE 1. Lack of the *Bhmt* gene induces adipose atrophy in mice. (A)** Bodyweight loss of  
334 *Bhmt* knockout (*Bhmt-KO*) compared to *Bhmt* wild type (*Bhmt-WT*). **(B)** Adipose weight  
335 normalized over body weight.  $n = 25$  *Bhmt-KO*;  $n = 24$  *Bhmt-WT*. **(C) and (D)** Representative  
336 stainings of sections from inguinal white adipose tissue (iWAT) from *Bhmt-WT* **(C)** and *Bhmt-*  
337 *KO* **(D)** Scale bar= 50  $\mu$ m. Results represent mean  $\pm$  SEM. \*\*\*\* $P \leq 0.0001$  by unpaired t-test.

338

339 **FIGURE 2. Lack of the *Bhmt* gene induces the expression of beige remodeling markers**  
340 **that induce browning.** mRNA levels of beige remodeling markers *Ucp1* **(A)**, *Pgc1a* **(B)**,  
341 and *Cidea* **(C)** in inguinal adipose tissue (iWAT) of *Bhmt-WT* and *Bhmt-KO* mice. Relative  
342 quantitative values (normalized to 36B4) are reported as fold change. Results represent mean  $\pm$   
343 SEM. \* $P \leq 0.05$ , \*\* $P \leq 0.01$  by Mann-Whitney test (A and C) and by unpaired t-test (B and D).  $n =$   
344 10 per group.

345

346 **FIGURE 3. Increase in plasma and liver homocysteine (Hcy) levels in *Bhmt-KO* mice.**  
347 **(A)** Plasma levels of Hcy are increased in *Bhmt-KO* mice ~50 fold when compared with *Bhmt-*  
348 *WT* mice.  $n = 5$  per group. **(B)** Liver Hcy levels were also increased ~20 fold in *Bhmt-KO* mice  
349 when compared with *Bhmt-WT*.  $n = 7$  *Bhmt-KO*;  $n = 5$  *Bhmt-WT*. Results represent mean  $\pm$  SEM.  
350 \* $P \leq 0.05$ , \*\* $P \leq 0.01$  by Mann-Whitney test.

351

352 **FIGURE 4. Endoplasmic reticulum (ER) stress is increased in *Bhmt-KO* livers and exhibit**  
353 **activation of CREBH.** mRNA levels of ER stress markers *Chop* **(A)**  $n = 10$  per group,  
354 and *Atf3* **(B)** are increased in liver *Bhmt-KO* mice compared to WT.  $n = 7$  *Bhmt-KO*;  $n = 8$  *Bhmt-*  
355 *WT* Relative quantitative values (normalized to 36B4) are reported as fold change. Results  
356 represent mean  $\pm$  SEM. \* $P \leq 0.05$ , \*\* $P \leq 0.01$  by unpaired t-test (A) and Mann Whitney test  
357 (B). **(C)** Representative western blot of full-length CREBH and cleaved CREBH from *Bhmt-*

358 *WT* and *Bhmt-KO*. GAPDH was used as a loading control. **(D)** The ratio of cleavaged CREBH  
359 divided by full-length CREBH. \* $P \leq 0.05$  by unpaired t-test.

360

361 **FIGURE 5. FGF21 is increased in *Bhmt-KO* plasma and liver. (A)** Plasma FGF21 levels are  
362 increased in plasma from *Bhmt-KO* mice when compared to *Bhmt-WT*.  $n=9$  per group  
363 Results represent mean  $\pm$  SEM. \* $P \leq 0.05$  by *t*-test. **(B)** mRNA levels of *Fgf21* in the liver are  
364 increased  $\sim 2$  fold. Relative quantitative values (normalized to 36B4) are reported as fold change.  
365 \*\*\*\* $P \leq 0.0001$  by *t*-test.  $n=5$  per group.

366

367 **FIGURE 6. Schematic representation of the effects of the deletion of *Bhmt* in liver and**  
368 **iWAT.** The schema summarizes our new findings where deletion of *Bhmt* in mice increases  
369 homocysteine levels leading to endoplasmic reticulum (ER) stress. ER stress led to an increase  
370 in the cleaved CREBH protein levels, which acts as a transcription factor that binds the FGF21  
371 promoter. FGF21 high levels exert their effects in iWAT.

372

373

374

375

376

377

378

379

380

381

382

383

## 384 References

- 385 1. Abdelmalek MF, Angulo P, Jorgensen RA, Sylvestre PB, Lindor KD. Betaine, a promising  
386 new agent for patients with nonalcoholic steatohepatitis: results of a pilot study. *Am J*  
387 *Gastroenterol.* 2001;96(9):2711-7.
- 388 2. Zhang K, Shen X, Wu J, Sakaki K, Saunders T, Rutkowski DT, et al. Endoplasmic  
389 reticulum stress activates cleavage of CREBH to induce a systemic inflammatory response  
390 Role of Endoplasmic Reticulum Stress and Unfolded Protein Responses in Health and Diseases.  
391 *Cell.* 2006;124(3):587-99.
- 392 3. Lupu DS, Orozco LD, Wang Y, Cullen JM, Pellegrini M, Zeisel SH. Altered methylation  
393 of specific DNA loci in the liver of Bhmt-null mice results in repression of Iqgap2 and F2rl2 and  
394 is associated with development of preneoplastic foci. *FASEB journal : official publication of the*  
395 *Federation of American Societies for Experimental Biology.* 2017;31(5):2090-103.
- 396 4. Pajares MA, Perez-Sala D. Betaine homocysteine S-methyltransferase: just a regulator of  
397 homocysteine metabolism? *Cell Mol Life Sci.* 2006;63(23):2792-803.
- 398 5. Teng YW, Mehedint MG, Garrow TA, Zeisel SH. Deletion of betaine-homocysteine S-  
399 methyltransferase in mice perturbs choline and 1-carbon metabolism, resulting in fatty liver and  
400 hepatocellular carcinomas. *J Biol Chem.* 2011;286(42):36258-67.
- 401 6. Ganu RS, Garrow TA, Sodhi M, Rund LA, Schook LB. Molecular characterization and  
402 analysis of the porcine betaine homocysteine methyltransferase and betaine homocysteine  
403 methyltransferase-2 genes. *Gene.* 2011;473(2):133-8.
- 404 7. Teng YW, Ellis JM, Coleman RA, Zeisel SH. Mouse betaine-homocysteine S-  
405 methyltransferase deficiency reduces body fat via increasing energy expenditure and impairing  
406 lipid synthesis and enhancing glucose oxidation in white adipose tissue. *J Biol Chem.*  
407 2012;287(20):16187-98.
- 408 8. Stockli J, Fisher-Wellman KH, Chaudhuri R, Zeng XY, Fazakerley DJ, Meoli CC, et al.  
409 Metabolomic analysis of insulin resistance across different mouse strains and diets. *J Biol Chem.*  
410 2017;292(47):19135-45.
- 411 9. Bing C, Trayhurn P. New insights into adipose tissue atrophy in cancer cachexia. *Proc Nutr*  
412 *Soc.* 2009;68(4):385-92.
- 413 10. Peschechera A, Eckel J. "Browning" of adipose tissue--regulation and therapeutic  
414 perspectives. *Arch Physiol Biochem.* 2013;119(4):151-60.
- 415 11. Petruzzelli M, Wagner EF. Mechanisms of metabolic dysfunction in cancer-associated  
416 cachexia. *Genes Dev.* 2016;30(5):489-501.
- 417 12. Han J, Meng Q, Shen L, Wu G. Interleukin-6 induces fat loss in cancer cachexia by  
418 promoting white adipose tissue lipolysis and browning. *Lipids Health Dis.* 2018;17(1):14.
- 419 13. Kir S, Komaba H, Garcia AP, Economopoulos KP, Liu W, Lanske B, et al. PTH/PTHrP  
420 Receptor Mediates Cachexia in Models of Kidney Failure and Cancer. *Cell Metab.*  
421 2016;23(2):315-23.
- 422 14. Petruzzelli M, Schweiger M, Schreiber R, Campos-Olivas R, Tsoli M, Allen J, et al. A  
423 switch from white to brown fat increases energy expenditure in cancer-associated cachexia. *Cell*  
424 *Metab.* 2014;20(3):433-47.
- 425 15. Ohno H, Shinoda K, Ohyama K, Sharp LZ, Kajimura S. EHMT1 controls brown adipose  
426 cell fate and thermogenesis through the PRDM16 complex. *Nature.* 2013;504(7478):163-7.
- 427 16. Defour M, Dijk W, Ruppert P, Nascimento EBM, Schrauwen P, Kersten S. The  
428 Peroxisome Proliferator-Activated Receptor alpha is dispensable for cold-induced adipose tissue  
429 browning in mice. *Mol Metab.* 2018;10:39-54.



- 430 17. Fisher FM, Kleiner S, Douris N, Fox EC, Mepani RJ, Verdeguer F, et al. FGF21 regulates  
431 PGC-1alpha and browning of white adipose tissues in adaptive thermogenesis. *Genes Dev.*  
432 2012;26(3):271-81.
- 433 18. Colgan SM, Hashimi AA, Austin RC. Endoplasmic reticulum stress and lipid dysregulation.  
434 *Expert Rev Mol Med.* 2011;13:e4.
- 435 19. Wang M, Zhao S, Tan M. bZIP transmembrane transcription factor CREBH: Potential role  
436 in non-alcoholic fatty liver disease (Review). *Mol Med Rep.* 2016;13(2):1455-62.
- 437 20. Ai Y, Sun Z, Peng C, Liu L, Xiao X, Li J. Homocysteine Induces Hepatic Steatosis  
438 Involving ER Stress Response in High Methionine Diet-Fed Mice. *Nutrients.* 2017;9(4).
- 439 21. Dionisio N, Jardin I, Salido GM, Rosado JA. Homocysteine, intracellular signaling and  
440 thrombotic disorders. *Curr Med Chem.* 2010;17(27):3109-19.
- 441 22. Faust PL, Kovacs WJ. Cholesterol biosynthesis and ER stress in peroxisome deficiency.  
442 *Biochimie.* 2014;98:75-85.
- 443 23. Kaplowitz N, Than TA, Shinohara M, Ji C. Endoplasmic reticulum stress and liver injury.  
444 *Semin Liver Dis.* 2007;27(4):367-77.
- 445 24. Lebeaupin C, Vallee D, Hazari Y, Hetz C, Chevet E, Bailly-Maitre B. Endoplasmic  
446 Reticulum stress signaling and the pathogenesis of Non-Alcoholic Fatty Liver Disease. *J Hepatol.*  
447 2018.
- 448 25. Mahdi AA, Rizvi SH, Parveen A. Role of Endoplasmic Reticulum Stress and Unfolded  
449 Protein Responses in Health and Diseases. *Indian J Clin Biochem.* 2016;31(2):127-37.
- 450 26. Wang CY, Zou W, Liang XY, Jiang ZS, Li X, Wei HJ, et al. Hydrogen sulfide prevents  
451 homocysteine-induced endoplasmic reticulum stress in PC12 cells by upregulating SIRT1. *Mol*  
452 *Med Rep.* 2017;16(3):3587-93.
- 453 27. Werstuck GH, Lentz SR, Dayal S, Hossain GS, Sood SK, Shi YY, et al. Homocysteine-  
454 induced endoplasmic reticulum stress causes dysregulation of the cholesterol and triglyceride  
455 biosynthetic pathways. *J Clin Invest.* 2001;107(10):1263-73.
- 456 28. Zhang C, Chen X, Zhu RM, Zhang Y, Yu T, Wang H, et al. Endoplasmic reticulum stress  
457 is involved in hepatic SREBP-1c activation and lipid accumulation in fructose-fed mice. *Toxicol*  
458 *Lett.* 2012;212(3):229-40.
- 459 29. Zhang K, Shen X, Wu J, Sakaki K, Saunders T, Rutkowski DT, et al. Endoplasmic  
460 reticulum stress activates cleavage of CREBH to induce a systemic inflammatory response. *Cell.*  
461 2006;124(3):587-99.
- 462 30. Zhang Z, Wei C, Zhou Y, Yan T, Wang Z, Li W, et al. Homocysteine Induces Apoptosis  
463 of Human Umbilical Vein Endothelial Cells via Mitochondrial Dysfunction and Endoplasmic  
464 Reticulum Stress. *Oxid Med Cell Longev.* 2017;2017:5736506.
- 465 31. Nakagawa Y, Satoh A, Yabe S, Furusawa M, Tokushige N, Tezuka H, et al. Hepatic  
466 CREB3L3 controls whole-body energy homeostasis and improves obesity and diabetes.  
467 *Endocrinology.* 2014;155(12):4706-19.
- 468 32. Park JG, Xu X, Cho S, Hur KY, Lee MS, Kersten S, et al. CREBH-FGF21 axis improves  
469 hepatic steatosis by suppressing adipose tissue lipolysis. *Sci Rep.* 2016;6:27938.
- 470 33. Kim H, Mendez R, Zheng Z, Chang L, Cai J, Zhang R, et al. Liver-enriched transcription  
471 factor CREBH interacts with peroxisome proliferator-activated receptor alpha to regulate  
472 metabolic hormone FGF21. *Endocrinology.* 2014;155(3):769-82.
- 473 34. Outinen PA, Sood SK, Liaw PC, Sarge KD, Maeda N, Hirsh J, et al. Characterization of  
474 the stress-inducing effects of homocysteine. *Biochem J.* 1998;332 ( Pt 1):213-21.

- 475 35. Outinen PA, Sood SK, Pfeifer SI, Pamidi S, Podor TJ, Li J, et al. Homocysteine-induced  
476 endoplasmic reticulum stress and growth arrest leads to specific changes in gene expression in  
477 human vascular endothelial cells. *Blood*. 1999;94(3):959-67.
- 478 36. Curro M, Condello S, Caccamo D, Ferlazzo N, Parisi G, Ientile R. Homocysteine-induced  
479 toxicity increases TG2 expression in Neuro2a cells. *Amino Acids*. 2009;36(4):725-30.
- 480 37. Ejaz A, Martinez-Guino L, Goldfine AB, Ribas-Aulinas F, De Nigris V, Ribo S, et al.  
481 Dietary Betaine Supplementation Increases Fgf21 Levels to Improve Glucose Homeostasis and  
482 Reduce Hepatic Lipid Accumulation in Mice. *Diabetes*. 2016;65(4):902-12.
- 483 38. Oakes SA, Papa FR. The role of endoplasmic reticulum stress in human pathology. *Annu*  
484 *Rev Pathol*. 2015;10:173-94.
- 485 39. Abdullahi A, Jeschke MG. White Adipose Tissue Browning: A Double-edged Sword.  
486 *Trends Endocrinol Metab*. 2016;27(8):542-52.
- 487 40. Nakagawa Y, Satoh A, Yabe S, Furusawa M, Tokushige N, Tezuka H, et al. Hepatic  
488 CREB3L3 controls whole-body energy homeostasis and improves obesity and diabetes  
489 CREB3L3 controls fatty acid oxidation and ketogenesis in synergy with PPARalpha.  
490 *Endocrinology*. 2014;155(12):4706-19.
- 491 41. Nakagawa Y, Satoh A, Tezuka H, Han SI, Takei K, Iwasaki H, et al. CREB3L3 controls  
492 fatty acid oxidation and ketogenesis in synergy with PPARalpha. *Sci Rep*. 2016;6:39182.
- 493 42. Fisher FM, Maratos-Flier E. Understanding the Physiology of FGF21. *Annu Rev Physiol*.  
494 2016;78:223-41.
- 495 43. Itoh N. FGF21 as a Hepatokine, Adipokine, and Myokine in Metabolism and Diseases.  
496 *Front Endocrinol (Lausanne)*. 2014;5:107.
- 497 44. Hu J, Christian M. Hormonal factors in the control of the browning of white adipose tissue.  
498 *Horm Mol Biol Clin Investig*. 2017;31(1).
- 499 45. Potthoff MJ, Inagaki T, Satapati S, Ding X, He T, Goetz R, et al. FGF21 induces PGC-  
500 1alpha and regulates carbohydrate and fatty acid metabolism during the adaptive starvation  
501 response. *Proc Natl Acad Sci U S A*. 2009;106(26):10853-8.
- 502 46. Sepa-Kishi DM, Ceddia RB. White and beige adipocytes: are they metabolically distinct?  
503 *Horm Mol Biol Clin Investig*. 2018;33(2).
- 504 47. Sepa-Kishi DM, Ceddia RB, Jankovic A, Otasevic V, Stancic A, Buzadzic B, et al. White  
505 and beige adipocytes: are they metabolically distinct?  
506 Physiological regulation and metabolic role of browning in white adipose tissue. *Horm Mol Biol*  
507 *Clin Investig*. 2018;33(2).
- 508 48. Vaitkus JA, Celi FS. The role of adipose tissue in cancer-associated cachexia. *Exp Biol*  
509 *Med (Maywood)*. 2017;242(5):473-81.
- 510 49. Argiles JM, Busquets S, Stemmler B, Lopez-Soriano FJ. Cancer cachexia: understanding  
511 the molecular basis. *Nat Rev Cancer*. 2014;14(11):754-62.
- 512 50. Kir S, Spiegelman BM. CACHEXIA & BROWN FAT: A BURNING ISSUE IN CANCER.  
513 *Trends Cancer*. 2016;2(9):461-3.
- 514 51. Kulyte A, Lorente-Cebrian S, Gao H, Mejhert N, Agustsson T, Arner P, et al. MicroRNA  
515 profiling links miR-378 to enhanced adipocyte lipolysis in human cancer cachexia. *Am J Physiol*  
516 *Endocrinol Metab*. 2014;306(3):E267-74.
- 517 52. Vegiopoulos A, Rohm M, Herzog S. Adipose tissue: between the extremes. *EMBO J*.  
518 2017;36(14):1999-2017.

- 519 53. Pellanda H, Namour F, Fofou-Caillierez M, Bressenot A, Alberto JM, Chery C, et al. A  
520 splicing variant leads to complete loss of function of betaine-homocysteine methyltransferase  
521 (BHMT) gene in hepatocellular carcinoma. *Int J Biochem Cell Biol.* 2012;44(2):385-92.  
522 54. Gibson TM, Brennan P, Han S, Karami S, Zaridze D, Janout V, et al. Comprehensive  
523 evaluation of one-carbon metabolism pathway gene variants and renal cell cancer risk. *PLoS One.*  
524 2011;6(10):e26165.  
525 55. Feng Q, Kalari K, Fridley BL, Jenkins G, Ji Y, Abo R, et al. Betaine-homocysteine  
526 methyltransferase: human liver genotype-phenotype correlation. *Mol Genet Metab.*  
527 2011;102(2):126-33.  
528 56. Li F, Feng Q, Lee C, Wang S, Pelleymounter LL, Moon I, et al. Human betaine-  
529 homocysteine methyltransferase (BHMT) and BHMT2: common gene sequence variation and  
530 functional characterization. *Mol Genet Metab.* 2008;94(3):326-35.  
531 57. Archer A, Venteclef N, Mode A, Pedrelli M, Gabbi C, Clément K, et al. Fasting-induced  
532 FGF21 is repressed by LXR activation via recruitment of an HDAC3 corepressor complex in mice.  
533 *Molecular Endocrinology.* 2012;26(12):1980-90.  
534 58. Lai S-C, Nakayama Y, Sequeira JM, Wlodarczyk BJ, Cabrera RM, Finnell RH, et al. The  
535 transcobalamin receptor knockout mouse: a model for vitamin B12 deficiency in the central  
536 nervous system. *FASEB J.* 2013;27(6):2468-75.  
537 59. Ducros V, Belva-Besnet H, Casetta B, Favier A. A robust liquid chromatography tandem  
538 mass spectrometry method for total plasma homocysteine determination in clinical practice. *Clin*  
539 *Chem Lab Med.* 2006;44(8):987-90.

540

541

542

543

544

545

546

547

548

549

Figure 1

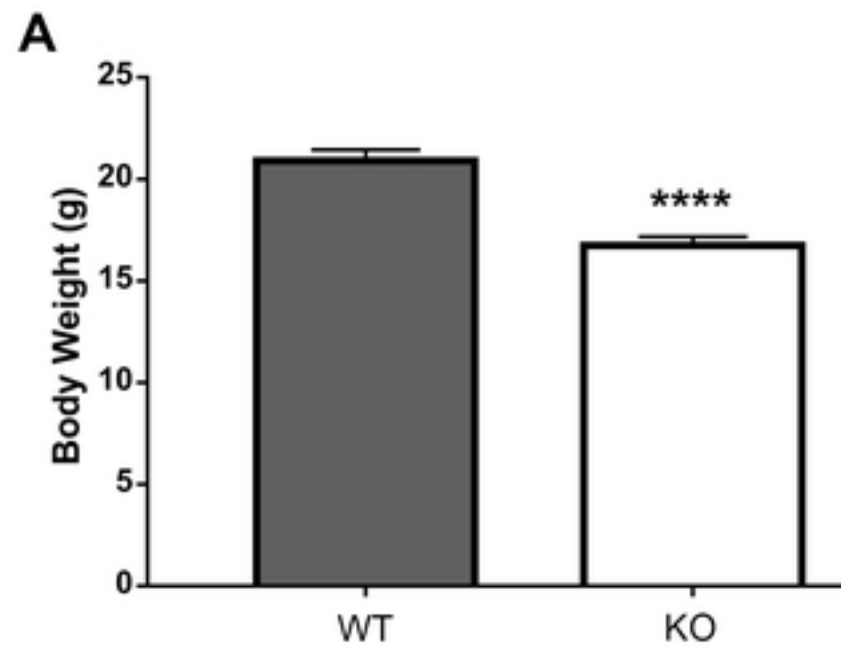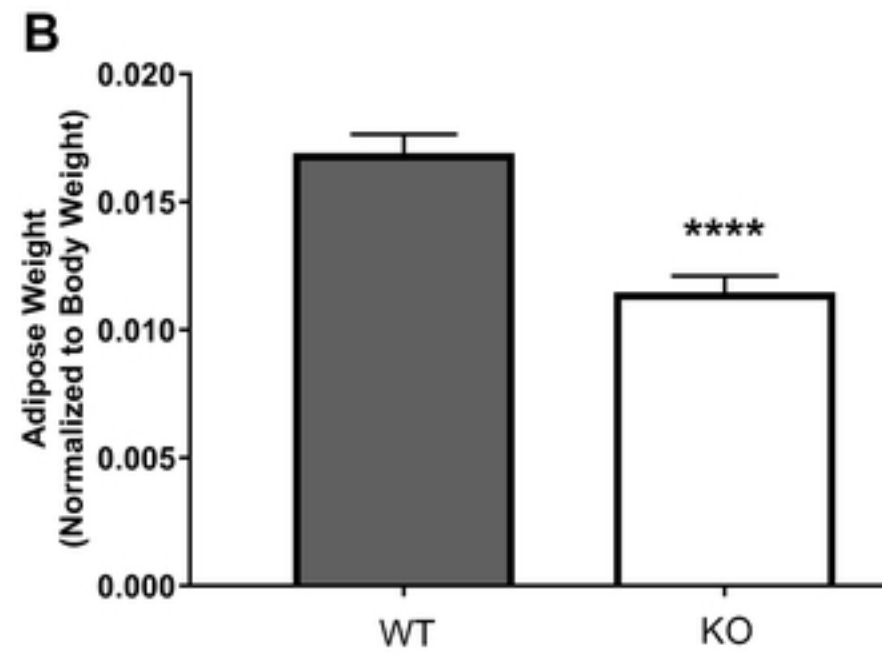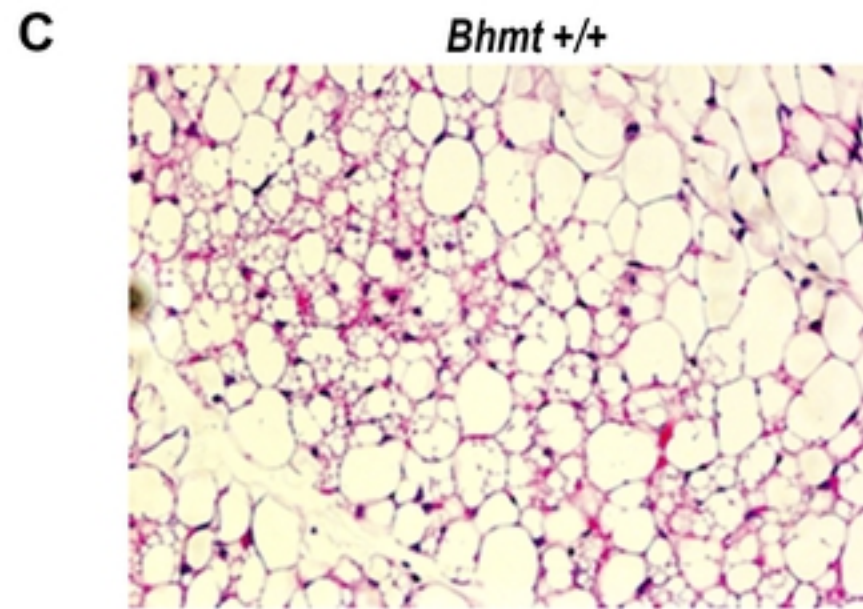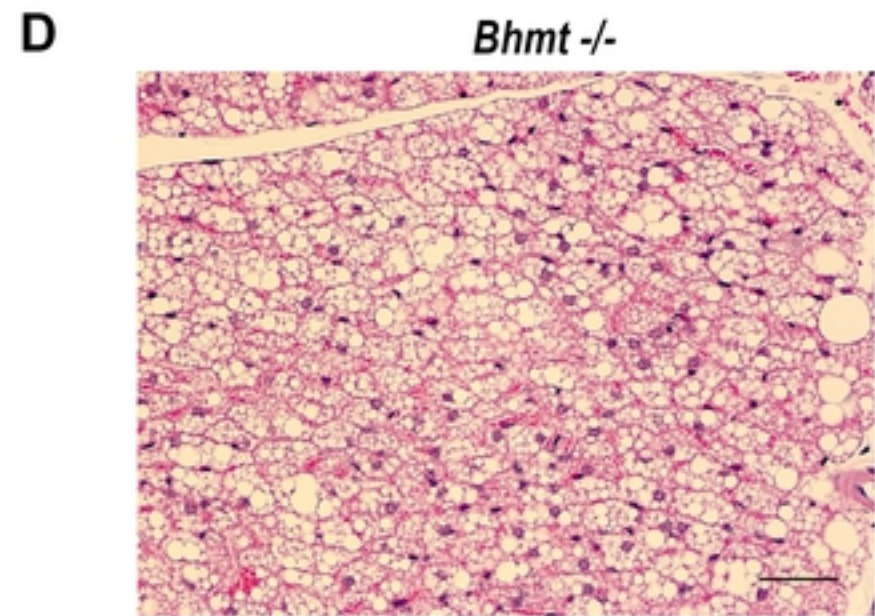

Figure 1

Figure 2

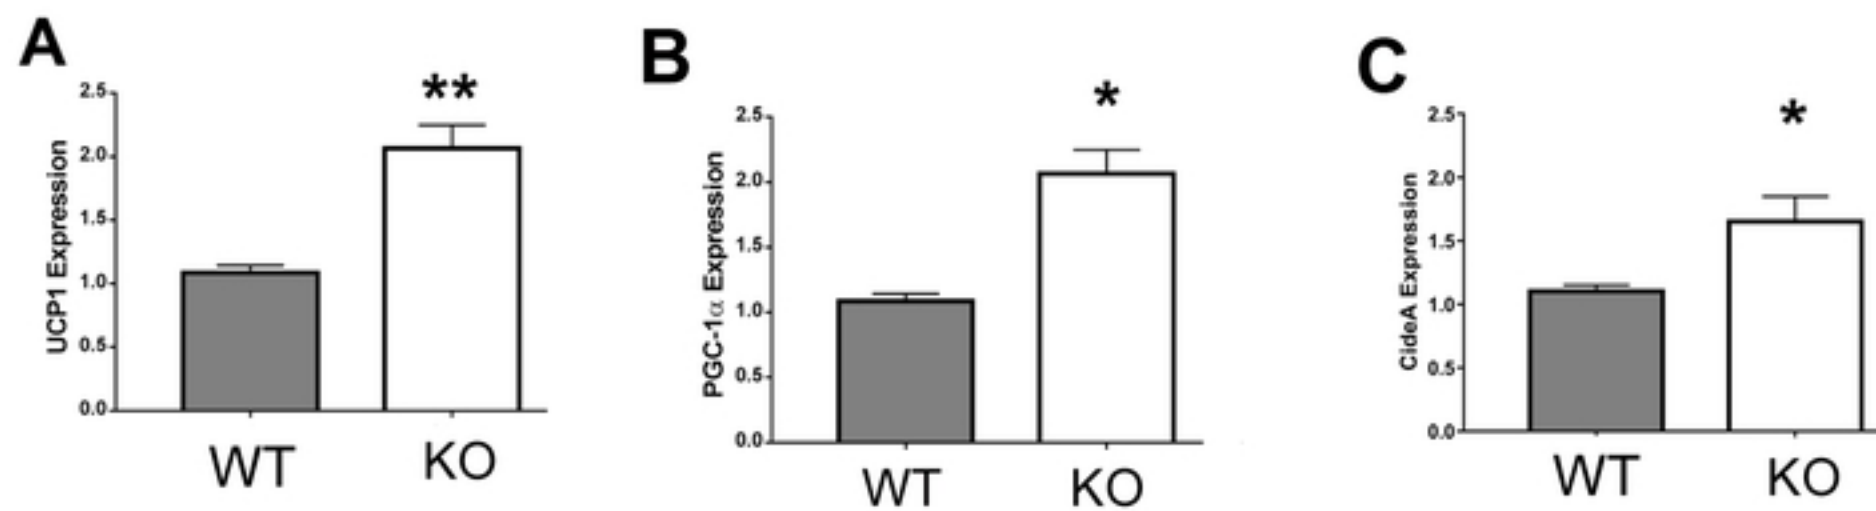

Figure 2

Figure 3

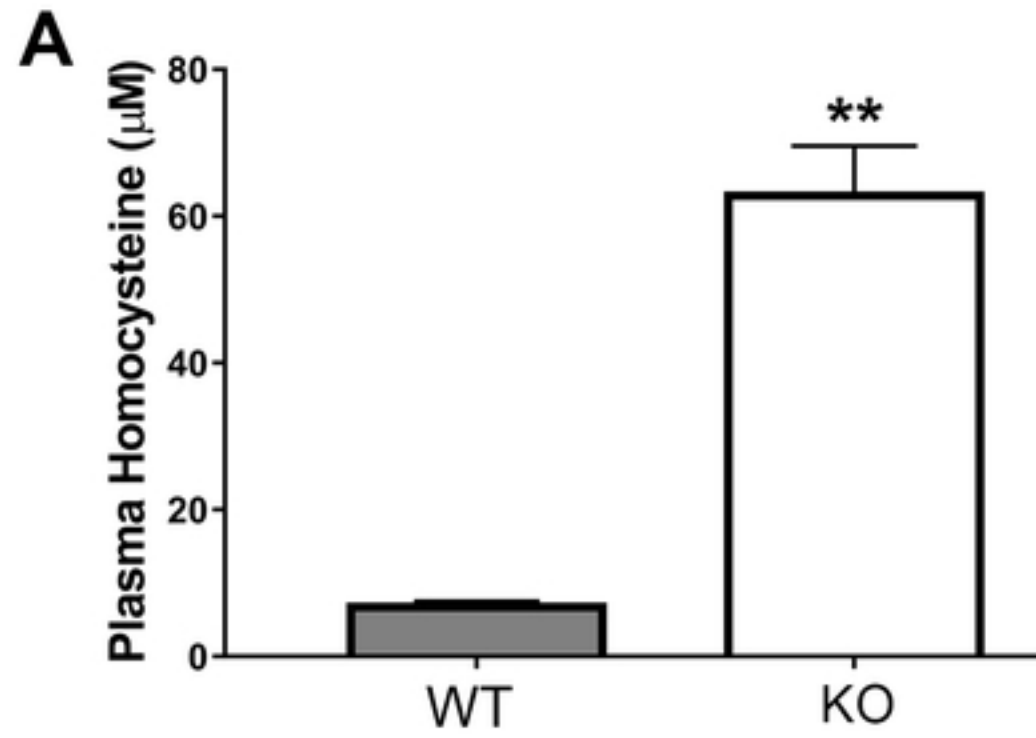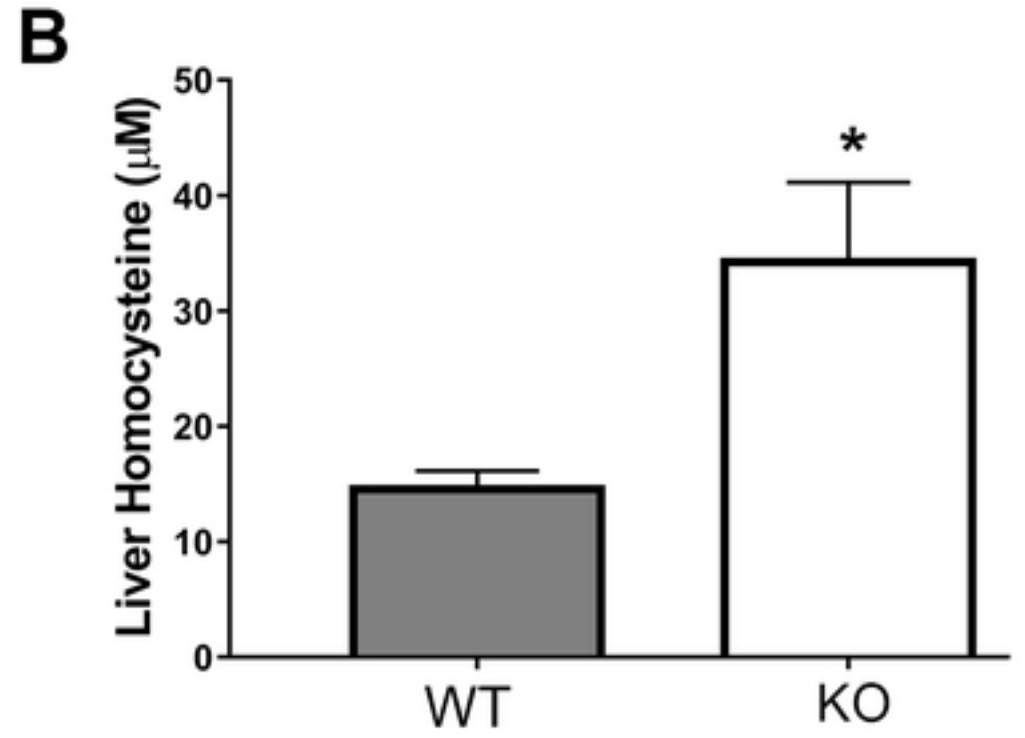

Figure 3

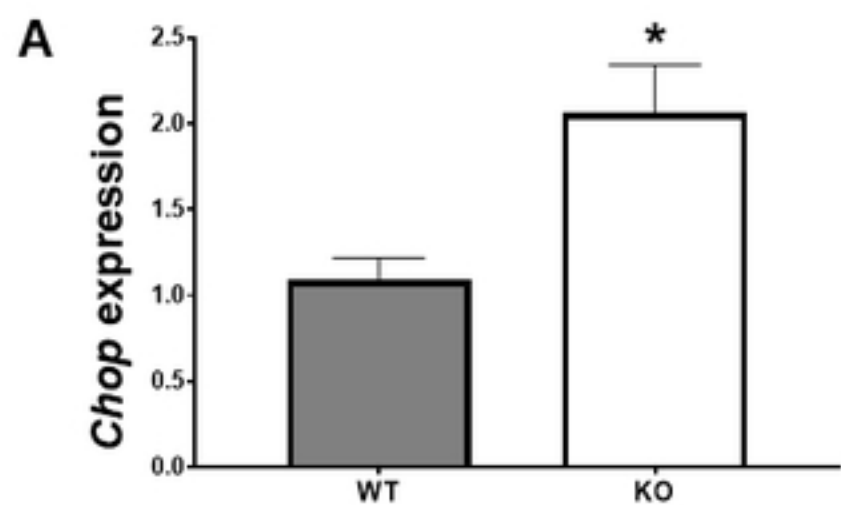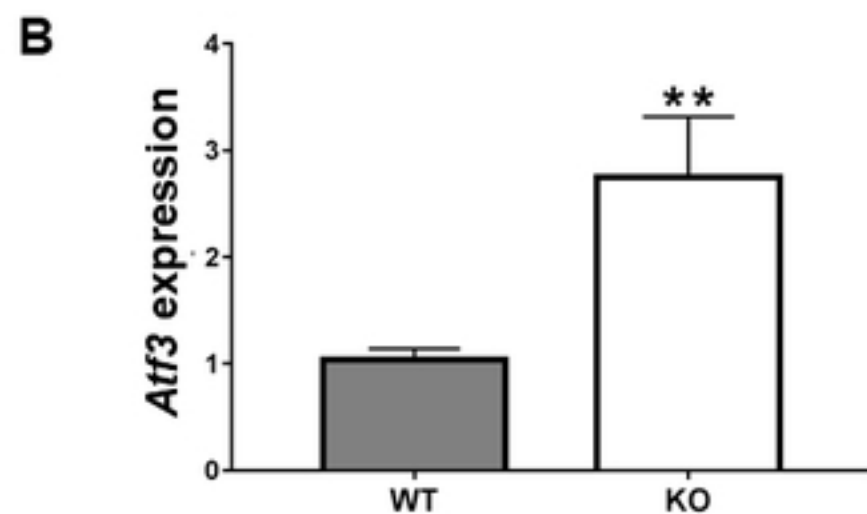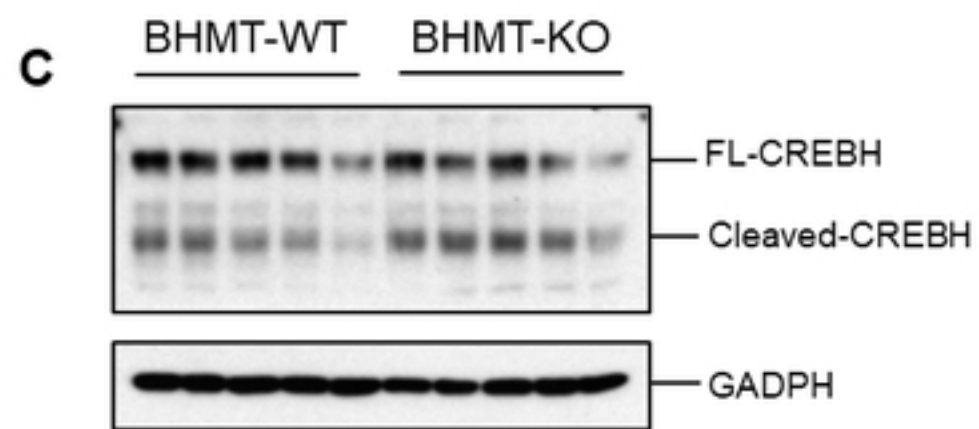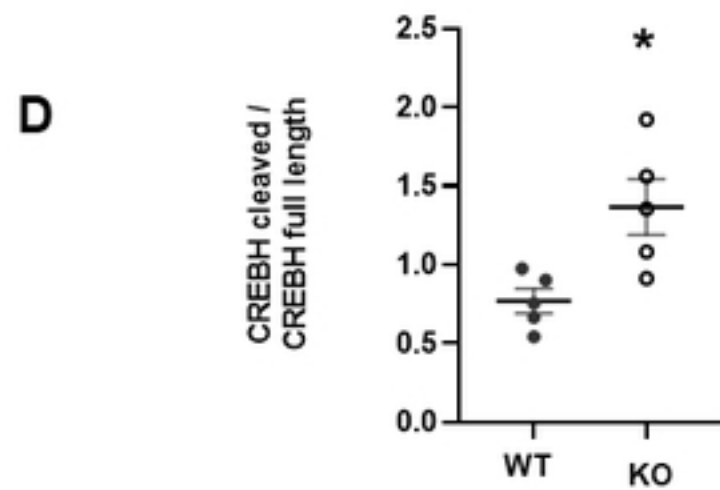

Figure 4

Figure 5

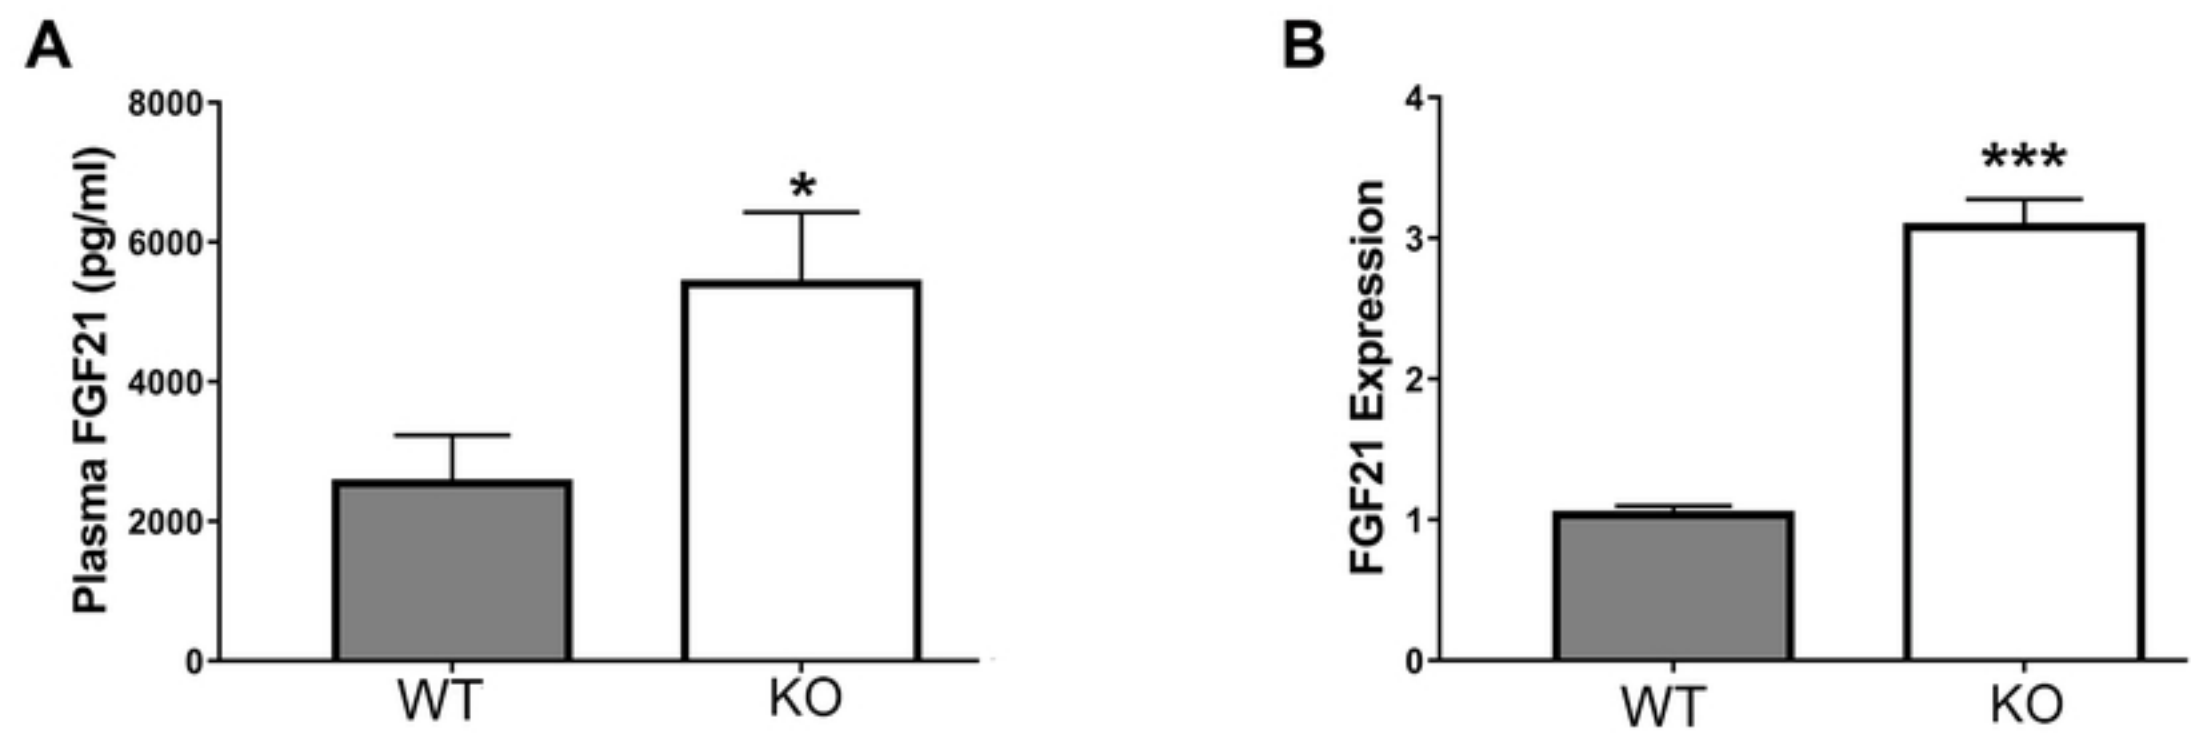

Figure 5



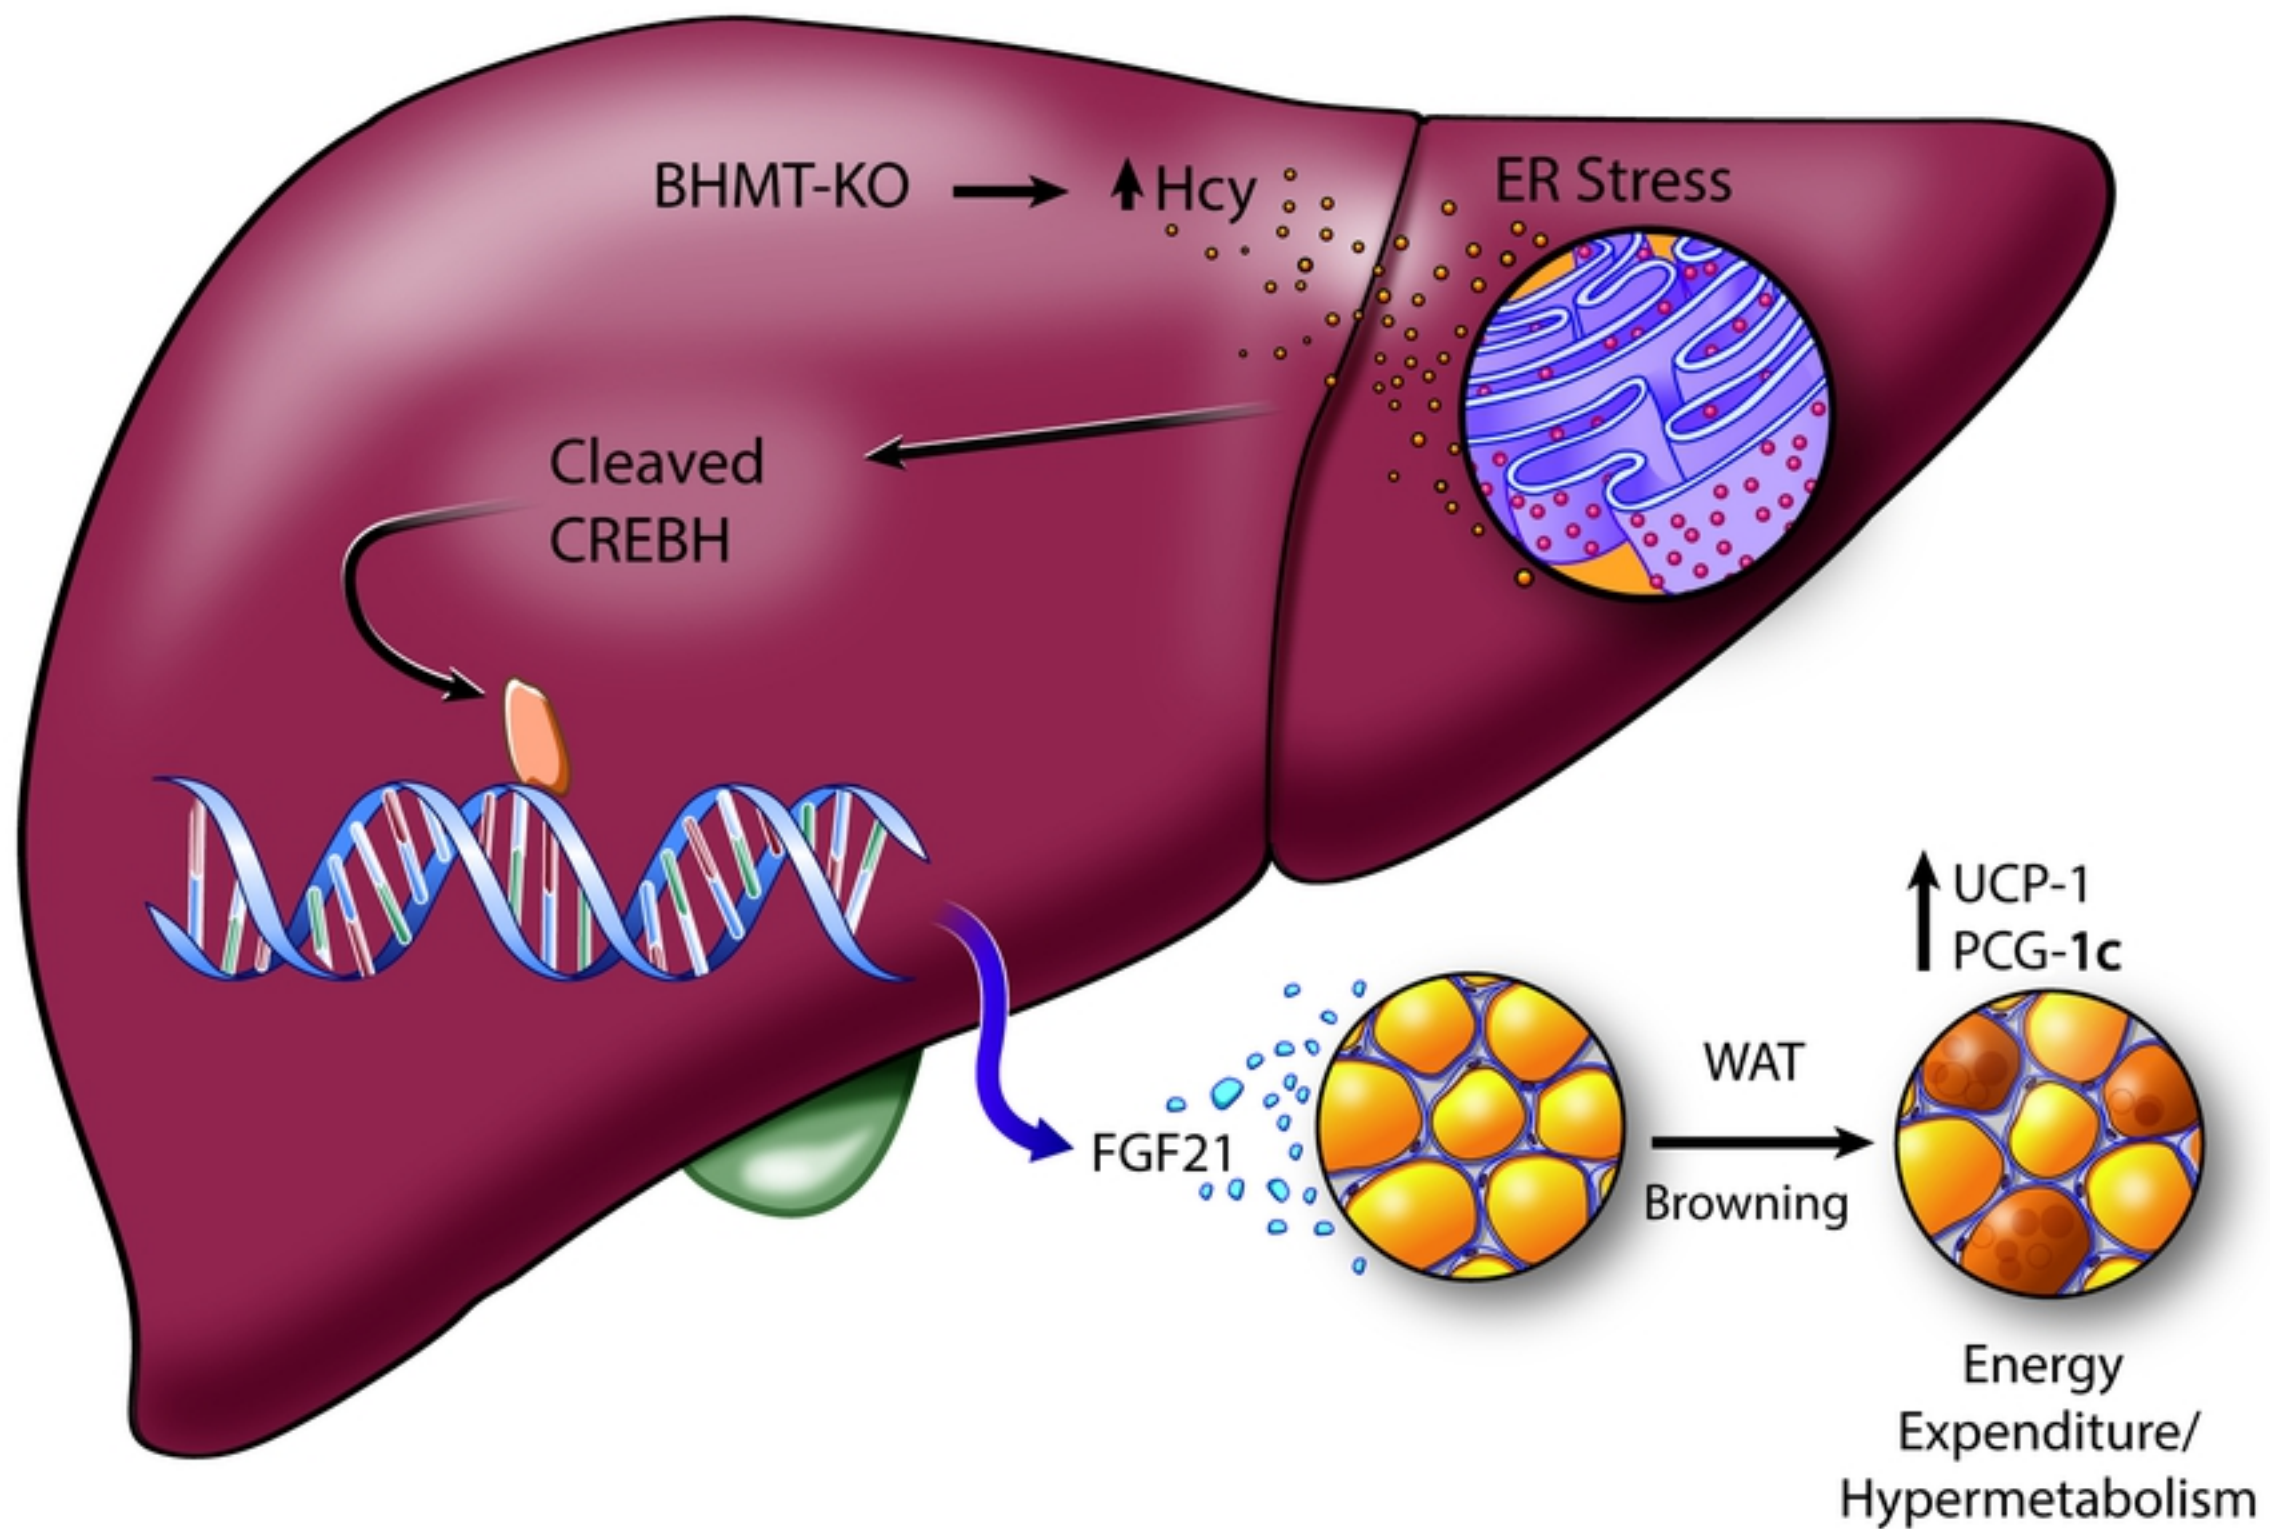

Figure 6
